# Supplementary material for: The characteristics and prognostic value of signet ring cell histology in gastric cancer: A retrospective cohort study of 2199 consecutive patients
Source: PubMed Central journal article supplement — Medicine (Baltimore). 2016 Jul 8;95(27):e4052. doi: 10.1097/MD.0000000000004052 (PMC5058817; doi:10.1097/md.0000000000004052), 2016-07-08
Supplement: medi-95-e4052-s001.pdf [file medi-95-e4052-s001.pdf]

## Appendix 1 Summary of the findings from published studies on gastric signet ring cell cancer

| Study, country, period              | Main inclusion criteria                                                          | N    | SRCC%  | Main findings: 1. Factors associated with more SRCC; 2. Prognostic factors identified by univariate analysis; 3. Prognostic factors identified by multivariate analysis                                                                                                                                                                                                                                                                                                                                                |
|-------------------------------------|----------------------------------------------------------------------------------|------|--------|------------------------------------------------------------------------------------------------------------------------------------------------------------------------------------------------------------------------------------------------------------------------------------------------------------------------------------------------------------------------------------------------------------------------------------------------------------------------------------------------------------------------|
| Arsene 1995, France, 1978-1987[1]   | All gastric cancer                                                               | 999  | 20-34% | 1. Not investigated; 2. Not investigated; 3. >75 years, invaded resection margins, lymph node involvement, metastasis, parietal wall involvement (for SRCC, HR not available, p>0.05)                                                                                                                                                                                                                                                                                                                                  |
| Bamboato 2014, USA, 1990-2009[2]    | Curatively resected gastric cancer                                               | 569  | 37%    | 1. Younger age, female, proximal/body region of stomach, serosal involvement, higher TNM stage; 2. histological type, tumor location, TNM stage, tumor size, number of positive node, adjuvant chemotherapy (for SRCC, HR not available, p<0.05); 3. Location, number of positive nodes (for SRCC, HR not available, p<0.05)                                                                                                                                                                                           |
| Bu 2013, China, 2004-2009[3]        | Mucinous gastric cancer or SRCC undergoing surgery                               | 181  | 59.1%  | 1. Younger age, stage I-II, middle and lower thirds and total stomach, smaller tumor size, negative lymph node metastasis, negative lymphatic vascular invasion; 2. Not investigated; 3. Not investigated                                                                                                                                                                                                                                                                                                              |
| Chen 2014, China, 2004-2008[4]      | Curatively resected gastric cancer                                               | 991  | 14.2%  | 1. Younger age, female, middle and lower thirds and total stomach, Bormann type IV, Lauren type diffuse, poor differentiation, later TNM stage; 2. Tumor location, gastrectomy, Bormann type, tumor size, histological type, Lauren type, tumor differentiation, vessel invasion, perineural invasion, TNM stage, adjuvant chemotherapy (for SRCC, HR not available, p<0.001); 3. Bormann type, histological type, vessel invasion, TNM stage, adjuvant chemotherapy (for SRCC, HR 1.072, 95% CI 1.001-1.147, p<0.001) |
| Choi 1996, Korea, --[5]             | Curatively resected locally advanced gastric cancer                              | 697  | --     | 1. Younger age; 2. Not investigated; 3. Not investigated                                                                                                                                                                                                                                                                                                                                                                                                                                                               |
| Cui 2015, China, 2003-2007[6]       | Curatively resected gastric cancer with complete clinical information            | 1447 | 19.9%  | 1. Female, middle and lower thirds and total stomach, later T stage, later TNM stage, metastasis, total resection; 2. Age, tumor size, location, Bormann type, histological type, TNM stage, resection type, adjuvant chemotherapy (for SRCC RR not available, p<0.001); 3. Age, tumor size, histological type, TNM stage, Bormann type, adjuvant chemotherapy (for non-SRCC vs SRCC, RR=0.606, 95% CI 0.511-0.718, p<0.001)                                                                                           |
| Dittmar 2015, Germany, 1994-2011[7] | Curatively resected node-negative gastric cancer                                 | 228  | 39.6%  | 1. Not investigated; 2. Sex, T category, lymphangiogenesis, tumor differentiation, serosal infiltration, histological growth pattern, tumor size and Lauren type (for SRCC: HR not available, p>0.05); 3. Tumor size, sex (for SRCC: HR not available, p>0.05)                                                                                                                                                                                                                                                         |
| Fang 2009, Taiwan, 1987-2005[8]     | Curatively resected mucinous gastric cancer or SRCC                              | 176  | 7.9%   | 1. Female, smaller tumor size, less deep cancer invasion; 2. Histological type (in early gastric cancer, HR for SRCC vs mucinous <1, p=0.012; in advanced gastric cancer, HR not available, p>0.05); 3. Not investigated                                                                                                                                                                                                                                                                                               |
| Gill 2003, Canada, 1978-1997[9]     | Gastric adenocarcinoma                                                           | 2043 | --     | 1. Asian; 2. No details (for SRCC: HR not available, p>0.05); 3. Tumor location, differentiation, extent of disease, resection, palliative chemotherapy (SRCC: not investigated)                                                                                                                                                                                                                                                                                                                                       |
| Ha 2008, Korea, 1994-2001[10]       | Curatively resected early gastric cancer                                         | 1520 | 25.5%  | 1. Female, younger age, less deep invasion, smaller tumor size, negative lymph node metastasis, negative lymphatic involvement; 2. Not investigated; 3. Not investigated                                                                                                                                                                                                                                                                                                                                               |
| Hass 2011, Germany, 2003-2007[11]   | All gastric cancer                                                               | 160  | 27.5%  | 1. Female, younger age, diffuse subtype, poor differentiation, corpus area, faster recurrence, metastasis; 2. Not investigated; 3. Tumor stage (for SRCC: not investigated)                                                                                                                                                                                                                                                                                                                                            |
| Heger 2014, Germany, 1987-2011[12]  | Locally advanced esophagogastric adenocarcinoma treated with neoadjuvant therapy | 723  | 32.5%  | 1. Female, gastric localization, advanced T category, Lauren type of diffuse/ non-intestinal histology, lower clinical response, no complication, no surgical complication, lower probability of curative resection; 2. Histological type, grading, localization, Lauren type, clinical response, complications, surgical complications, TNM stage, resection type (for SRCC: HR not available, P<0.001); 3. Clinical response, complications, surgical complications, TNM stage (for SRCC: HR not available, p>0.05)  |

|                                     |                                                        |      |           |                                                                                                                                                                                                                                                                                                                                                                                                                                                                                                                                                                                                                                                                                                                                                                                                                                                            |
|-------------------------------------|--------------------------------------------------------|------|-----------|------------------------------------------------------------------------------------------------------------------------------------------------------------------------------------------------------------------------------------------------------------------------------------------------------------------------------------------------------------------------------------------------------------------------------------------------------------------------------------------------------------------------------------------------------------------------------------------------------------------------------------------------------------------------------------------------------------------------------------------------------------------------------------------------------------------------------------------------------------|
| Huh 2013, Korea, 1999-2005[13]      | Early gastric cancer undergoing surgery                | 2208 | 24.4%     | 1. Younger age, female, location of mid-body, mucosa-confined, depressed type, lower lymph node metastasis, lower lymphovascular invasion; 2. SRCC associated with better survival, HR not available, p=0.002; 3. Not investigated                                                                                                                                                                                                                                                                                                                                                                                                                                                                                                                                                                                                                         |
| Hyung 2002, Korea, 1987-1995[14]    | Early gastric cancer undergoing gastrectomy            | 933  | 28.2%     | 1. Female, younger age, middle and lower stomach, depressed macroscopic type, less deep invasion, no lymph node metastasis, fewer number of involved lymph node; 2. SRCC associated with better survival, HR not available, p=0.01; 3. Not investigated                                                                                                                                                                                                                                                                                                                                                                                                                                                                                                                                                                                                    |
| Jiang 2011, China, 1980-2004[15]    | All gastric cancer undergoing gastrectomy              | 2315 | 9.1%      | 1. In early gastric cancer: younger age, female, less deep invasion; in advanced gastric cancer: younger age, male, larger tumor size, Borrmann type III-IV, deeper invasion, negative peritoneal dissemination, curative; 2. Not investigated; 3. In early gastric cancer: age, lymphovascular invasion, curability (for SRCC: RR=2.36, p=0.01); in advanced gastric cancer: age, tumor size, tumor location, macroscopic type, depth of invasion, lymphovascular invasion, lymph node metastasis, hepatic metastasis, peritoneal dissemination, curability (for SRCC: RR=1.171, p=0.085)                                                                                                                                                                                                                                                                 |
| Jiang 2013, China, 1997-2007[16]    | Mucinous gastric cancer or SRCC undergoing gastrectomy | 368  | 11.8%     | 1. Middle and lower stomach, no distant metastasis, D2 and above lymph node dissection, less deep invasion, advanced Borrmann type, early TNM stage, early lymph node status; 2. No details (for SRCC: HR not available, p=0.064); 3. Not investigated                                                                                                                                                                                                                                                                                                                                                                                                                                                                                                                                                                                                     |
| Jin 2015, USA, 2000-2012[17]        | Curatively resected lymph node negative gastric cancer | 805  | 33%       | 1. Not investigated; 2. Not investigated; 3. T stage, tumor size, histological grade, histological type, number of lymph node examined, lymphovascular invasion, perineural invasion (for SRCC: HR=2.1, p=0.01)                                                                                                                                                                                                                                                                                                                                                                                                                                                                                                                                                                                                                                            |
| Kim 1994, Korea, 1981-1991[18]      | All gastric cancer undergoing surgery                  | 3702 | 12.2%     | 1. In early gastric cancer: younger age, female, middle-third stomach, less deep invasion, fewer lymph nodes metastasis; in advanced gastric cancer: younger age, female, large tumor size, middle-third stomach, deeper invasion, more lymph nodes metastasis; 2. Not investigated; 3. In early gastric cancer: SRCC not associated with prognosis (HR not available); in advanced gastric cancer: SRCC associated with worse prognosis (HR not available)                                                                                                                                                                                                                                                                                                                                                                                                |
| Kim 2004, Korea, 1980-1999[19]      | All gastric cancer undergoing surgery                  | 2358 | 8.7%      | 1. Younger age, smaller tumor size, early T stage, negative lymph node invasion, negative hepatic metastasis, early stage, curative; 2. Not investigated; 3. Lymph node metastasis, curability (for SRCC: RR=0.948, p>0.05)                                                                                                                                                                                                                                                                                                                                                                                                                                                                                                                                                                                                                                |
| Kim 2005, Korea, 1986-2000[20]      | Gastric cancer aged <36 years or >70 years             | 2014 | 3.1-18.3% | 1. Not investigated; 2. In those aged >75 years: tumor size, depth of invasion, differentiation, operation type, lymph node invasion (for SRCC: not investigated); 3. In those aged >75 years: differentiation, curability, lymph node metastasis (for SRCC: not investigated)                                                                                                                                                                                                                                                                                                                                                                                                                                                                                                                                                                             |
| Kim 2014, Korea, 2002-2008[21]      | Curatively resected gastric cancer                     | 224  | 4.5-12.5% | 1. Not investigated; 2. Not investigated; 3. Not investigated                                                                                                                                                                                                                                                                                                                                                                                                                                                                                                                                                                                                                                                                                                                                                                                              |
| Kunisaki 2004, Japan, 1980-1998[22] | Curatively resected gastric cancer                     | 1113 | 15.6%     | 1. In early gastric cancer: Younger age, female, middle third stomach, larger tumor size, depressed type of lesion; in advanced gastric cancer: younger age, female, poor differentiation, middle third stomach, smaller tumor size; 2. In early gastric cancer: age, macroscopic appearance, depth of invasion, histological type, number of lymph node involved (for SRCC: HR=4.88, p=0.008); in advanced gastric cancer: age, tumor location, macroscopic appearance, tumor size, depth of invasion, number of lymph node involved, lymphatic invasion, venous invasion (for SRCC: HR not available, p>0.05); 3. In early gastric cancer: age, number of lymph node involved, (for SRCC: HR=3.56, p=0.036); in advanced gastric cancer: age, tumor size, depth of invasion, number of lymph node involved, venous invasion (for SRCC: not investigated) |
| Kwon 2013, Korea,                   | Gastric adenocarcinoma                                 | 769  | 14.0%     | 1. In early gastric cancer: younger age, female, perineural invasion, flat or depressed macroscopic type,                                                                                                                                                                                                                                                                                                                                                                                                                                                                                                                                                                                                                                                                                                                                                  |

|                                     |                                                                                                     |      |       |                                                                                                                                                                                                                                                                                                                                                                                                                                                                                                                                                                                                                        |
|-------------------------------------|-----------------------------------------------------------------------------------------------------|------|-------|------------------------------------------------------------------------------------------------------------------------------------------------------------------------------------------------------------------------------------------------------------------------------------------------------------------------------------------------------------------------------------------------------------------------------------------------------------------------------------------------------------------------------------------------------------------------------------------------------------------------|
| 1999-2009[23]                       | undergoing surgery                                                                                  |      |       | larger tumor size, middle or lower stomach; in advanced gastric cancer: younger age, female, middle or lower stomach, flat or depressed macroscopic type, perineural invasion, no hepatic metastasis; 2. In early gastric cancer: age, TNM stage (for SRCC HR=0.869, p=0.824); in advanced gastric cancer: age, tumor size, venous invasion, perineural invasion, lymphovascular invasion, TNM stage, chemotherapy, surgery type (for SRCC: HR=0.925, p=0.750); 3. In early gastric cancer: age, TNM stage (SRCC: not investigated); in advanced gastric cancer: age, TNM stage, surgery type (SRCC: not investigated) |
| Lee 2012, Japan, 1989-2005[24]      | Gastric adenocarcinoma undergoing gastrectomy accompanied by lymph node dissection                  | 1376 | 23.3% | 1. Younger age, smaller tumor size, Lauren type of diffuse, no lymphatic invasion, no vascular invasion, no perineural invasion, less deep invasion, less lymph node metastasis, early pathological type; 2. SRCC associated with better survival (HR not available, p<0.05); 3. Age, gender, depth of invasion, lymph node metastasis, curability (for SRCC: HR not available, p>0.05)                                                                                                                                                                                                                                |
| Lee 2013, Korea, 2003-2005[25]      | Node-negative advanced gastric cancer undergoing curative gastrectomy with extended lymphadenectomy | 424  | --    | 1. Not investigated; 2. Depth of invasion, differentiation, tumor size, histological type (for SRCC: HR=2.65, p<0.02); 3. Differentiation, depth of invasion (SRCC: not investigated)                                                                                                                                                                                                                                                                                                                                                                                                                                  |
| Lee 2015, Korea, 2003-2011[26]      | Early gastric cancer undergoing curative gastrectomy with lymph node dissection                     | 696  | 16.4% | 1. Female, younger age, middle stomach, flat or depressed macroscopic type; 2. Not investigated; 3. Not investigated                                                                                                                                                                                                                                                                                                                                                                                                                                                                                                   |
| Li 2007, China, 1987-2003[27]       | All advanced gastric cancer undergoing surgery                                                      | 4759 | 13.9% | 1. Larger tumor size, advanced Borrmann types, deeper invasion, more lymph node metastasis, negative perineural invasion, advanced stage, noncurative; 2. Not investigated; 3. Depth of invasion, lymph node metastasis, hepatic metastasis, peritoneal dissemination, curability (for SRCC RR=1.016, p=0.219)                                                                                                                                                                                                                                                                                                         |
| Maehara 1992, Japan, 1965-1985[28]  | Gastric cancer undergoing gastrectomy                                                               | 1500 | 3.4%  | 1. In early gastric cancer: younger age, female, larger tumor size; in advanced gastric cancer: younger age, female, less prominent serosal invasion; 2. SRCC with better prognosis (HR not available, p<0.01); 3. Not investigated                                                                                                                                                                                                                                                                                                                                                                                    |
| Nered 2006, Russia, --[29]          | Gastric cancer undergoing gastrectomy                                                               | 372  | 16.1% | 1. Younger age, female, less lymph node metastasis, more involvement of perigastric fatty tissue, peritoneum and ovary; 2. Not investigated; 3. Not investigated                                                                                                                                                                                                                                                                                                                                                                                                                                                       |
| Otsuji 1998, Japan, 1970-1994[30]   | Gastric cancer undergoing gastrectomy                                                               | 1498 | 10.3% | 1. In early gastric cancer: female, middle stomach, more IIc and less I/IIa type of gross appearance; in advanced gastric cancer: bigger tumor size, more peritoneal metastasis, more extended radical lymph node dissection and curative surgery; 2. In early gastric cancer: SRCC associated with better survival (HR not available, p<0.05); in advanced gastric cancer: for SRCC, p>0.05; 3. Not investigated                                                                                                                                                                                                      |
| Park 2008, Korea, 1983-2002[31]     | Gastric cancer undergoing gastrectomy                                                               | 2275 | 11.0% | 1. Younger age, female, middle stomach, greater surgical curability, early T/N stage; 2. Not investigated; 3. In stage IV gastric cancer: curative resection, number of dissected lymph nodes, gender, Borrmann type, histological type (for SRCC: RR=1.872, p=0.001)                                                                                                                                                                                                                                                                                                                                                  |
| Park 2009, Korea, 2000-2005[32]     | All gastric cancer                                                                                  | 3362 | 16.4% | 1. Younger age; 2. Tumor location, Lauren type, depth of invasion, lymph node involvement, TNM stage, metastasis of liver/peritoneum/other distant tissue, type of resection, curative resection, lymphatic invasion, vein invasion, CA19-9, CEA (for SRCC: HR and p not available); 3. Stage, vein invasion, curative resection, CA19-9 (for SRCC: HR and p not available)                                                                                                                                                                                                                                            |
| Piessen 2009, France, 1996-2007[33] | Advanced gastric cancer undergoing surgery                                                          | 215  | 27.4% | 1. No macroscopic aspect of linitis plastica, advanced N category, more lymph node involvement, less curative resection, positive proximal margin, positive distant margin; 2. ASA grade, weight loss, nonantro-                                                                                                                                                                                                                                                                                                                                                                                                       |

|                                       |                                                                                                                                                      |       |       |                                                                                                                                                                                                                                                                                                                                                                                                                                               |
|---------------------------------------|------------------------------------------------------------------------------------------------------------------------------------------------------|-------|-------|-----------------------------------------------------------------------------------------------------------------------------------------------------------------------------------------------------------------------------------------------------------------------------------------------------------------------------------------------------------------------------------------------------------------------------------------------|
|                                       |                                                                                                                                                      |       |       | pyloric tumoral location, macroscopic aspect of linitis plastica, enlarged resection to neighboring organ, incomplete resection, depth of invasion, lymph node invasion, advanced TNM stage (for SRCC: HR not available, p=0.004); 3. TNM stage, nonantro-pyloric tumoral location, histological type (for SRCC: HR=1.5, p=0.004)                                                                                                             |
| Postlewait 2015, USA, 2000-2012[34]   | All gastric adenocarcinoma undergoing curative-intent resection                                                                                      | 768   | 40.6% | 1. Female, younger age, poor differentiation, perineural invasion, microscopically positive resection, distal location, adjuvant therapy, more advanced stage, earlier recurrence; 2. For SRCC: HR not available, p=0.011; 3. Tumor size, perineural invasion, TNM stage, adjuvant therapy (for SRCC: HR=0.75, p=0.095)                                                                                                                       |
| Shim 2014, Korea, 1998-2005[35]       | Gastric adenocarcinoma undergoing curative gastrectomy                                                                                               | 2643  | 14.3% | 1. Younger age, female, open approach, middle stomach, shorter proximal margin, less depth of invasion, less advanced stage, no adjuvant therapy, no recurrence; 2. Gender, age, resection extent, tumor location, tumor size, proximal margin, lymph node status, depth of invasion, stage, adjuvant therapy, recurrence (for SRCC: HR=0.83, p=0.1232); 3. Age, resection extent, adjuvant therapy, recurrence (for SRCC: HR=1.16, p=0.3298) |
| Shridhar 2013, USA, 2004-2008[36]     | Metastatic gastric adenocarcinoma, diffuse carcinoma or signet ring cell carcinoma with known information on status of surgery and radiation therapy | 5072  | 7.3%  | 1. Not investigated; 2. Not investigated; 3. Age, surgery, radiation, TNM stage (for SRCC HR=1.218, p=0.002)                                                                                                                                                                                                                                                                                                                                  |
| Sirohi 2014, India, 2012-2013[37]     | Advanced gastric cancer                                                                                                                              | 128   | 37.5% | 1. Not investigated; 2. Performance status, type of chemotherapy, number of chemotherapy drugs used, second-line therapy (SRCC: not investigated); 3. Performance status, type of chemotherapy (SRCC: not investigated)                                                                                                                                                                                                                       |
| Taghavi 2012, USA, 2004-2007[38]      | All adenocarcinoma and SRC with complete information                                                                                                 | 10246 | 26.0  | 1. Younger age, female, stage T3-4, lymph node involvement, distant metastasis, lower and middle stomach; 2. Age, race, surgical resection, AJCC stage, TNM stage, radiation therapy (for SRCC: HR=1.06, p=0.07); 3. Stratified by radiation and AJCC stage: age, race, surgical resection (for SRCC: HR=1.05, p=0.150)                                                                                                                       |
| Theuer 1999, USA, 1984-1994[39]       | All gastric cancer                                                                                                                                   | 3020  | 15%   | 1. Younger age, female, distal stomach; 2. Not investigated; 3. For SRCC: RR=1.027, p>0.1                                                                                                                                                                                                                                                                                                                                                     |
| Triboulet 2013, France, 1997-2010[40] | pTis or pT1 adenocarcinoma tumor                                                                                                                     | 421   | 24.7% | 1. Younger age, non-extensive surgical resection, submucosa; Not investigated; 3. Not investigated                                                                                                                                                                                                                                                                                                                                            |
| Walker 1996, USA, 1978-1994[41]       | All gastric carcinoma, excluding lymphoma and sarcoma                                                                                                | 192   | 9%    | 1. Younger age; 2. Not investigated; 3. Not investigated                                                                                                                                                                                                                                                                                                                                                                                      |
| Yao 2005, USA, 1985-1999[42]          | Invasive gastric cancer                                                                                                                              | 1987  | 30.6% | 1. White people; 2. Race, tumor stage, WHO histological type, tumor location, age (for SRCC HR=1.36, p<0.01); 3. Race, tumor stage, WHO histological type, tumor location, age (for SRCC HR=1.34, p=0.01)                                                                                                                                                                                                                                     |
| Yokota 1998, Japan, 1985-1995[43]     | Gastric carcinoma                                                                                                                                    | 683   | 10.1% | 1. Younger age, female, larger tumor size, infiltrative growth pattern, scirrhous cancer-stromal relationship; 2. In early gastric cancer: no difference in survival between SRCC vs non-SRCC; in advanced gastric cancer: SRCC associated with poorer prognosis; 3. Not investigated                                                                                                                                                         |
| Yoon 2010, USA, 1980-1997[44]         | Adenocarcinoma of esophagus, gastroesophageal junction, or gastric cardia undergoing complete tumor                                                  | 796   | --    | 1. Not investigated; 2. Age, TNM stage, tumor grade, SRCC, extracapsular lymph node (for SRCC: HR=1.58, p<0.001); 3. Age, TNM stage, preoperative chemotherapy or radiotherapy (SRCC: not investigated)                                                                                                                                                                                                                                       |

|                                  | resection                             |      |       |                                                                                                                                                                                                                                                                                                                                                             |
|----------------------------------|---------------------------------------|------|-------|-------------------------------------------------------------------------------------------------------------------------------------------------------------------------------------------------------------------------------------------------------------------------------------------------------------------------------------------------------------|
| Zhang 2010, China, 1993-2003[45] | All gastric cancer undergoing surgery | 1439 | 15.1% | 1. Smaller tumor size, middle stomach, advanced Borrmann type, less depth of invasion, less lymph node metastasis, less advanced stage, less lymphatic invasion, less curability, no chemotherapy; 2. For SRCC: HR not available, p=0.013; 3. Tumor size, serosal invasion, lymph node metastasis, curative resection (non-SRCC vs SRCC: RR=1.263, p=0.068) |
| Zheng 2010, Japan, -- [46]       | All gastric adenocarcinoma            | --   | --    | 1. Younger age, female, weaker expression of ki-67, CPP32, p53, parafibromin, GRP78, GRP94, P-GSK3β-ser9, VEGF or cortactin; 2. Not investigated; 3. Differentiation, mucinous subtype, age, invasion depth, lymphatic invasion, peritoneal dissemination, WHO classification (for SRCC HR and p not available)                                             |

- [1] Arsène D, Chomontowski J, Pottier D, Rougereau A, Launoy G, Gignoux M. Epidemiology and prognosis of gastric carcinomas at the province of Calvados. A 10-year study. *Gastroentérologie Clin Biol* 1995;19:797–803.
- [2] Bamboat ZM, Tang LH, Vinuela E, Kuk D, Gonen M, Shah MA, Brennan MF, Coit DG, Strong VE. Stage-stratified prognosis of signet ring cell histology in patients undergoing curative resection for gastric adenocarcinoma. *Ann Surg Oncol* 2014;21:1678–85.
- [3] Bu Z, Zheng Z, Li Z, Wu X, Zhang L, Wu A, Zong X, Ji J. Clinicopathological and prognostic differences between mucinous gastric carcinoma and signet-ring cell carcinoma. *Chin J Cancer Res* 2013;25:32–8.
- [4] Chen L, Shi Y, Yuan J, Wu Q, Han Y, Qin R, Jia B, Wei B, Wei L, Dai G, Jiao S. Evaluation of docetaxel- and oxaliplatin-based adjuvant chemotherapy in postgastrectomy gastric cancer patients reveals obvious survival benefits in docetaxel-treated mixed signet ring cell carcinoma patients. *Med Oncol* 2014;31:159.

- [5] Choi JH1, Chung HC, Yoo NC, Lee HR, Lee KH, Kim JH, Roh JK, Park CS, Min JS, Lee KS, Kim BS, Lim HY. Gastric cancer in young patients who underwent curative resection. Comparative study with older patients. *Am J Clin Oncol* 1996;19:45–8.
- [6] Cui J, Liang H, Deng J, Ding X, Wang X, Zhang L, Liang Y, Jiang N. Clinicopathological features and prognostic analysis of patients with signet ring cell gastric carcinoma. *Zhonghua Zhong Liu Za Zhi* 2015;37:367–70.
- [7] Dittmar Y, Schüle S, Koch A, Rauchfuss F, Scheuerlein H, Settmacher U. Predictive factors for survival and recurrence rate in patients with node-negative gastric cancer--a European single-centre experience. *Langenbeck's Arch Surg / Dtsch Gesellschaft Für Chir* 2015;400:27–35.
- [8] Fang WL, Wu CW, Lo SS, Chen JH, Hsieh MC, Shen KH, Li AF, Tai LC, Lui WY. Mucin-producing gastric cancer: clinicopathological difference between signet ring cell carcinoma and mucinous carcinoma. *Hepatogastroenterology* 56:1227–31.
- [9] Gill S, Shah A, Le N, Cook EF, Yoshida EM. Asian ethnicity-related differences in gastric cancer presentation and outcome among patients treated at a canadian cancer center. *J Clin Oncol* 2003;21:2070–6.
- [10] Ha TK, An JY, Youn HK, Noh JH, Sohn TS, Kim S. Indication for endoscopic mucosal resection in early signet ring cell gastric cancer. *Ann Surg Oncol* 2008;15:508–13.
- [11] Hass HG, Smith U, Jäger C, Schäffer M, Wellhäuber U, Hehr T, Markmann HU, Nehls O, Denzlinger C. Signet ring cell carcinoma of the stomach is significantly associated with poor prognosis and diffuse gastric cancer (Lauren's): single-center experience of 160 cases. *Onkologie* 2011;34:682–6.

- [12] Heger U, Blank S, Wiecha C, Langer R, Weichert W, Lordick F, Bruckner T, Dobritz M, Burian M, Springfield C, Grenacher L, Siewert JR, Büchler M, Ott K. Is preoperative chemotherapy followed by surgery the appropriate treatment for signet ring cell containing adenocarcinomas of the esophagogastric junction and stomach? *Ann Surg Oncol* 2014;21:1739–48.
- [13] Huh CW, Jung da H, Kim JH, Lee YC, Kim H, Kim H, Yoon SO, Youn YH, Park H, Lee SI, Choi SH, Cheong JH, Noh SH. Signet ring cell mixed histology may show more aggressive behavior than other histologies in early gastric cancer. *J Surg Oncol* 2013;107:124–9.
- [14] Hyung WJ, Noh SH, Lee JH, Huh JJ, Lah KH, Choi SH, Min JS. Early gastric carcinoma with signet ring cell histology. *Cancer* 2002;94:78–83.
- [15] Jiang CG, Wang ZN, Sun Z, Liu FN, Yu M, Xu HM. Clinicopathologic characteristics and prognosis of signet ring cell carcinoma of the stomach: Results from a chinese mono-institutional study. *J Surg Oncol* 2011;103:700–3.
- [16] Jiang H1, Zhang H, Tian L, Zhang X, Xue Y. The difference in clinic-pathological features between signet ring cell carcinoma and gastric mucinous adenocarcinoma. *Tumour Biol* 2013;34:2625–31.
- [17] Jin LX, Moses LE, Squires MH 3rd, Poultsides GA, Votanopoulos K, Weber SM, Bloomston M, Pawlik TM, Hawkins WG, Linehan DC, Strasberg SM, Schmidt C, Worhunsky DJ, Acher AW, Cardona K, Cho CS, Kooby DA, Levine E, Winslow ER, Saunders ND, Spolverato G, Maithel SK, Fields RC. Factors Associated With Recurrence and Survival in Lymph Node-Negative Gastric Adenocarcinoma: A 7-Institution Study of the US Gastric Cancer Collaborative. *Ann Surg* 2015.
- [18] Kim JP, Kim SC, Yang HK. Prognostic significance of signet ring cell carcinoma of the stomach. *Surg Oncol* 1994;3:221–7.
- [19] Kim DY, Park YK, Joo JK, Ryu SY, Kim YJ, Kim SK, Lee JH. Clinicopathological characteristics of signet ring cell carcinoma of the stomach. *ANZ J Surg*

2004;74:1060–4.

- [20] Kim DY, Joo JK, Ryu SY, Park YK, Kim YJ, Kim SK. Clinicopathologic characteristics of gastric carcinoma in elderly patients: a comparison with young patients. *World J Gastroenterol* 2005;11:22–6.
- [21] Kim KH, Kim YM, Kim MC, Jung GJ. Analysis of prognostic factors and outcomes of gastric cancer in younger patients: a case control study using propensity score methods. *World J Gastroenterol* 2014;20:3369–75.
- [22] Kunisaki C, Shimada H, Nomura M, Matsuda G, Otsuka Y, Akiyama H. Therapeutic strategy for signet ring cell carcinoma of the stomach. *Br J Surg* 2004;91:1319–24.
- [23] Kwon KJ, Shim KN, Song EM, Choi JY, Kim SE, Jung HK, Jung SA. Clinicopathological characteristics and prognosis of signet ring cell carcinoma of the stomach. *Gastric Cancer* 2013;17:43–53.
- [24] Lee HH, Song KY, Park CH, Jeon HM. Undifferentiated-type gastric adenocarcinoma: prognostic impact of three histological types. *World J Surg Oncol* 2012;10:254.
- [25] Lee IS, Yook JH, Kim TH, Kim HS, Kim KC, Oh ST, Kim BS. Prognostic factors and recurrence pattern in node-negative advanced gastric cancer. *Eur J Surg Oncol* 2013;39:136–40.
- [26] Lee SH1, Jee SR, Kim JH, Seol SY. Intramucosal gastric cancer: the rate of lymph node metastasis in signet ring cell carcinoma is as low as that in well-differentiated adenocarcinoma. *Eur J Gastroenterol Hepatol* 2015;27:170–4.

- [27] Li C, Kim S, Lai JF, Hyung WJ, Choi WH, Choi SH, Noh SH. Advanced gastric carcinoma with signet ring cell histology. *Oncology* 2007;72:64–8.
- [28] Yoshihiko Maehara, Yoshihisa Sakaguchi, Sunao Moriguchi, Hiroyuki Orita, Daisuku Korenaga, Shunji Kohnoe KS. Signet Ring Cell Carcinoma of the Stomach. *Cancer* 1992;69:1645–50.
- [29] Nered SN, Klimenkov AA, Smilidi IS, et al. Signet ring cancer of the stomach: clinico-morphological features, postsurgical results and prognosis. *Vopr Onkol* 2006;52:294–300.
- [30] Otsuji E, Yamaguchi T, Sawai K, Takahashi T. Characterization of signet ring cell carcinoma of the stomach. *J Surg Oncol* 1998;67:216–20.
- [31] Park JM, Jang YJ, Kim JH, Park SS, Park SH, Kim SJ, Mok YJ, Kim CS. Gastric cancer histology: clinicopathologic characteristics and prognostic value. *J Surg Oncol* 2008;98:520–5.
- [32] Park JC1, Lee YC, Kim JH, Kim YJ, Lee SK, Hyung WJ, Noh SH, Kim CB. Clinicopathological aspects and prognostic value with respect to age: an analysis of 3,362 consecutive gastric cancer patients. *J Surg Oncol* 2009;99:395–401.
- [33] Piessen G, Messager M, Leteurtre E, Jean-Pierre T, Mariette C. Signet ring cell histology is an independent predictor of poor prognosis in gastric adenocarcinoma regardless of tumoral clinical presentation. *Ann Surg* 2009;250:878–87.
- [34] Postlewait LM, Squires MH 3rd, Kooby DA, Poultides GA, Weber SM, Bloomston M, Fields RC, Pawlik TM, Votanopoulos KI, Schmidt CR, Ejaz A, Acher AW,

Worhunsy DJ, Saunders N, Swords D, Jin LX, Cho CS, Winslow ER, Cardona K, Staley CA, Maithel SK. The Prognostic Value of Signet-Ring Cell Histology in Resected Gastric Adenocarcinoma. *Ann Surg Oncol* 2015.

- [35] Shim JH, Song KY, Kim HH, Han SU, Kim MC, Hyung WJ, Kim W, Lee HJ, Ryu SW, Cho GS, Ryu SY. Signet Ring Cell Histology Is Not an Independent Predictor of Poor Prognosis After Curative Resection for Gastric Cancer a propensity analysis by the KLASS Group. *Medicine (Baltimore)* 2014;93:e136.
- [36] Shridhar R, Almhanna K, Hoffe SE, Fulp W, Weber J, Chuong MD, Meredith KL. Increased survival associated with surgery and radiation therapy in metastatic gastric cancer: a Surveillance, Epidemiology, and End Results database analysis. *Cancer* 2013;119:1636–42.
- [37] Sirohi B, Rastogi S, Dawood S, Talole S, Ramadwar M, Shetty N, Shrikhande SV. Treatment of patients with advanced gastric cancer: experience from an Indian tertiary cancer center. *Med Oncol* 2014;31:138.
- [38] Taghavi S, Jayarajan SN, Davey A, Willis AI. Prognostic significance of signet ring gastric cancer. *J Clin Oncol* 2012;30:3493–8.
- [39] Theuer CP, Nastanski F, Brewster WR, Butler JA, Anton-Culver H. Signet ring cell histology is associated with unique clinical features but does not affect gastric cancer survival. *Am Surg* 1999;65:915–21.
- [40] Triboulet JP, Gronnier C, Messenger M, Piessen G, Mariette C; FREGAT Working Group. Does early signet ring cell gastric carcinoma carry a worse prognosis? *Bull Acad Natl Med* 2013;197:443–55; discussion 455–6.
- [41] Walker MJ. A review of carcinoma of the stomach at a tertiary care referral hospital. *Am J Surg* 1996;172:75–8.

- [42] Yao JC1, Tseng JF, Worah S, Hess KR, Mansfield PF, Crane CH, Schnirer II, Reddy S, Chiang SS, Najam A, Yu C, Giacco GG, Xie K, Wu TT, Feig BW, Pisters PW, Ajani JA. Clinicopathologic behavior of gastric adenocarcinoma in Hispanic patients: analysis of a single institution's experience over 15 years. *J Clin Oncol* 2005;23:3094–103.
- [43] Yokota T1, Kunii Y, Teshima S, Yamada Y, Saito T, Kikuchi S, Yamauchi H. Signet ring cell carcinoma of the stomach: a clinicopathological comparison with the other histological types. *Tohoku J Exp Med* 1998;186:121–30.
- [44] Yoon HH, Khan M, Shi Q, Cassivi SD, Wu TT, Quevedo JF, Burch PA, Sinicrope FA, Diasio RB. The prognostic value of clinical and pathologic factors in esophageal adenocarcinoma: a mayo cohort of 796 patients with extended follow-up after surgical resection. *Mayo Clin Proc* 2010;85:1080–9.
- [45] Zhang M, Zhu G, Zhang H, Gao H, Xue Y. Clinicopathologic Features of Gastric Carcinoma with Signet Ring Cell Histology. *J Gastrointest Surg* 2009;14:601–6.
- [46] Zheng HC, Zheng YS, Xia P, Xu XY, Xing YN, Takahashi H, Guan YF, Takano Y. The pathobiological behaviors and prognosis associated with Japanese gastric adenocarcinomas of pure WHO histological subtypes. *Histol Histopathol* 2010;25:445–52.
